# Supplementary material
Source: PubMed Central journal article supplement (PMC10050409)
Supplement: 41598_2023_31818_MOESM1_ESM.pdf [file 41598_2023_31818_MOESM1_ESM.pdf]

A Low Dose of RBD and TLR7/8 Agonist Displayed on Influenza Virosome Particles Protects Rhesus Macaque Against SARS-CoV-2 challenge.

Gerrit Koopman<sup>1</sup>, Mario Amacker<sup>2,3</sup>, Toon Stegmann<sup>4</sup>, Ernst J. Verschoor<sup>1</sup>, Babs E. Verstrepen<sup>1</sup>,  
Farien Bhoelan<sup>4</sup>, Denzel Bemelman<sup>4</sup>, Kinga P. Böszörményi<sup>1</sup>, Zahra Fagrouch<sup>1</sup>, Gwendoline Kiemenyi-  
Kayere<sup>1</sup>, Daniella Mortier<sup>1</sup>, Dagmar E. Verel<sup>1</sup>, Henk Niphuis<sup>1</sup>, Roja Fidel Acar<sup>1</sup>, Ivanela Kondova<sup>5</sup>,  
Yolanda S. Kap<sup>1</sup>, Willy M. J. M. Bogers<sup>1</sup>, Petra Mooij<sup>1</sup>, and Sylvain Fleury<sup>2\*</sup>

<sup>1</sup>Department of Virology, Biomedical Primate Research Centre (BPRC), Rijswijk, Netherlands.

<sup>2</sup>Mymetics SA, 4 route de la Corniche, 1066 Epalinges, Switzerland.

<sup>3</sup>Department for BioMedical Research DBMR, Department of Pulmonary Medicine, Inselspital, Bern University Hospital, University of Bern, 3008 Bern, Switzerland

<sup>4</sup>Mymetics BV, JH Oortweg 21, 2333 CH Leiden, The Netherlands.

<sup>5</sup>Animal Science Department, Biomedical Primate Research Centre (BPRC), Rijswijk, Netherlands

\*Corresponding author: Sylvain Fleury, Mymetics SA, 4 route de la Corniche, 1066 Epalinges, Switzerland. Email address: [sylvain.fleury@mymetics.com](mailto:sylvain.fleury@mymetics.com).

A Low Dose of RBD and TLR7/8 Agonist Displayed on Influenza Virosome Particles Protects Rhesus Macaque Against SARS-CoV-2 challenge. Gerrit Koopman *et al.*

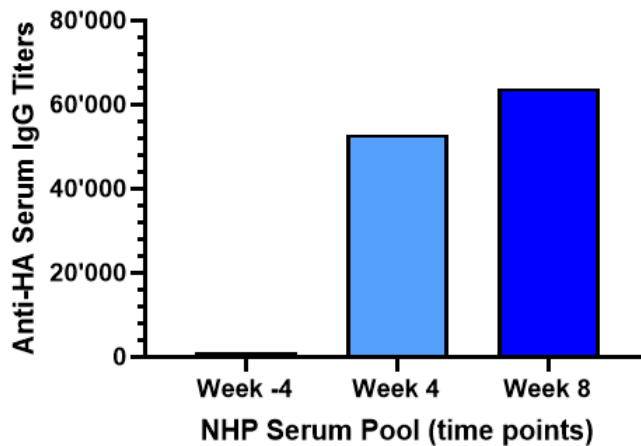

**Supplementary Figure S1.** ELISA serum IgG titers against influenza hemagglutinin (HA). NHP serum pools were collected at three different time points and evaluated in an ELISA coated with inactivated influenza virus A/Brisbane/59/2007 H1N1. Left bar: Day of intramuscular priming with inactivated influenza virus solution that corresponds to four weeks before vaccination (week -4). Middle bar: Four weeks after 1<sup>st</sup> vaccination performed with Virosome-RBD (week 4). Right bar: Four weeks after the second vaccination performed with Virosome-RBD (week 8). ELISA plates were coated with 1 mg HA/well for 16h at 4°C. After blocking and washing the wells, macaque serum IgGs bound to the HA were detected with a polyclonal goat anti-monkey IgG conjugated to horseradish peroxidase. After washing the plates, the TMB solution was added and the reaction was stopped by adding an acidic solution (H<sub>2</sub>SO<sub>4</sub>) that generates a yellow colour, and the optical density values were measured at 450 nm.

A Low Dose of RBD and TLR7/8 Agonist Displayed on Influenza Virosome Particles Protects Rhesus Macaque Against SARS-CoV-2 challenge. Gerrit Koopman *et al.*

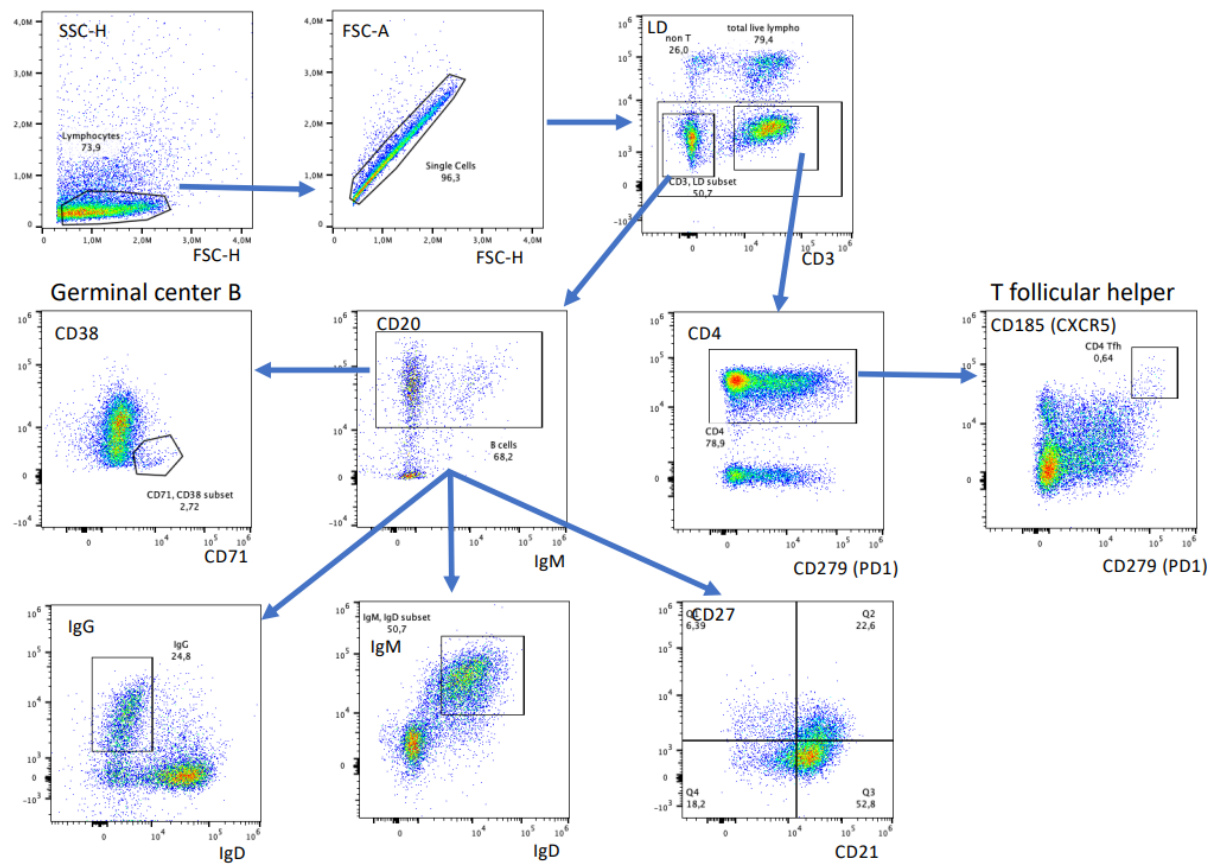

**Supplementary Figure S2.** Cytometry gating strategy on spleen cells collected at the day of euthanasia. During necropsy at day 7, 8 or 9 post challenge, the spleen was collected from the macaques. FACS analysis was performed on single cell suspensions that had been prepared from spleen obtained at autopsy. Thawed cells were first incubated with live/dead blue dead cell stain kit (Molecular Probes, cat. no. L23105). After 20 min. incubation, the cells were washed and then incubated with a mAb mixture containing: CD21<sup>BUV563</sup> (BD bioscience, cat 741362), CD27<sup>BUV661</sup> (BD, cat 741609), CD71<sup>B480</sup> (BD, cat 746247), CD95<sup>BV711</sup> (biolegend, cat 305644), CD38<sup>FITC</sup> (Stem cell technologies, cat 10415), goat anti-human IgD<sup>Alexa555</sup> (Southern Biotechnology Inc, cat 2030-32), CD297<sup>BV785</sup> (PD1) (biolegend, cat 329930), CD185<sup>PE</sup> (CXCR5) (Ebioscience, cat 12-9185-42), IgM<sup>PerCP-Cy5.5</sup> (BD, cat 561285), IgG<sup>APC</sup> (BD, cat 550931), CD3<sup>Alexa700</sup> (BD, cat 641414) diluted in Brilliant Stain Buffer Plus (BD, cat 566349). After 30 min incubation at 4°C in the dark, the cells were washed and fixed overnight at 4°C in 2% (w/v) paraformaldehyde solution in PBS. Flow cytometry was performed on an Aurora FACS machine using company software (Cytek, Fremont, CA, USA). For each tube the maximum number of events were recorded. Germinal center (GC) B cells and T follicular helper (Tfh) cells were analyzed by selecting cells within the lymphocyte gate, and then the singlets by using the forward scatter area plotted against the forward scatter height. Subsequently dead cells were excluded, and GC were identified as: CD3<sup>neg</sup>/CD20<sup>pos</sup>/CD38<sup>neg</sup>/CD71<sup>pos</sup> cells, while Tfh were identified as CD3<sup>pos</sup>/CD4<sup>pos</sup>CD279 (PD1)<sup>bright</sup>/CD185 (CXCR5)<sup>pos</sup>.

A Low Dose of RBD and TLR7/8 Agonist Displayed on Influenza Virosome Particles Protects Rhesus Macaque Against SARS-CoV-2 challenge. Gerrit Koopman *et al.*

**Table S1.** Clinical chemistry parameters for evaluating the virosomes-RBD/3M-052 vaccine safety and tolerance.

| Parameter                                                     | Albumin | Alkaline Phosphatase | Alanine amino-transferase | Amylase | Bilirubin total | Urea     | Calcium | Phosphate | Creatinin | Glucose | Sodium | Potassium | Total Protein | Globulin |    |
|---------------------------------------------------------------|---------|----------------------|---------------------------|---------|-----------------|----------|---------|-----------|-----------|---------|--------|-----------|---------------|----------|----|
| Abbreviation                                                  | ALB     | ALP                  | ALT                       | AMY     | TBIL            | BUN Urea | CA      | PHOS      | CRE       | GLU     | NA+    | K+        | TP            | GLOB     |    |
| Unit                                                          | g/L     | U/L                  | U/L                       | U/L     | umol/L          | mmol/L   | mmol/L  | mmol/L    | umol/L    | mmol/L  | mmol/L | mmol/L    | g/L           | g/L      |    |
| Normal low                                                    | 42      | 73                   | 20                        | 146     | 4               | 3.4      | 2.31    | 0.85      | 39        | 3.7     | 141    | 3.6       | 59            | 14       |    |
| Normal high                                                   | 53      | 498                  | 153                       | 467     | 6.42            | 10.1     | 2.72    | 2.01      | 119       | 9.8     | 154    | 5.2       | 78            | 28       |    |
| Animal week -4<br>Flu priming                                 | V1      | 51                   | 114                       | 32      | 341             | 6        | 4.3     | 2.54      | 0.92      | 82      | 6      | 147       | 4.6           | 65       | 16 |
|                                                               | V2      | 57                   | 114                       | 32      | 341             | 6        | 4.3     | 2.54      | 0.92      | 82      | 6      | 147       | 4.6           | 65       | 17 |
|                                                               | V3      | 49                   | 114                       | 32      | 341             | 6        | 4.3     | 2.54      | 0.92      | 82      | 6      | 147       | 4.6           | 65       | 18 |
|                                                               | V4      | 52                   | 114                       | 32      | 341             | 6        | 4.3     | 2.54      | 0.92      | 82      | 6      | 147       | 4.6           | 65       | 19 |
|                                                               | V5      | 53                   | 114                       | 32      | 341             | 6        | 4.3     | 2.54      | 0.92      | 82      | 6      | 147       | 4.6           | 65       | 20 |
|                                                               | V6      | 52                   | 114                       | 32      | 341             | 6        | 4.3     | 2.54      | 0.92      | 82      | 6      | 147       | 4.6           | 65       | 17 |
|                                                               | C1      | 50                   | 114                       | 32      | 341             | 6        | 4.3     | 2.54      | 0.92      | 82      | 6      | 147       | 4.6           | 65       | 17 |
|                                                               | C2      | 52                   | 114                       | 32      | 341             | 6        | 4.3     | 2.54      | 0.92      | 82      | 6      | 147       | 4.6           | 65       | 18 |
|                                                               | C3      | 52                   | 94                        | 35      | 214             | 5        | 4.5     | 2.51      | 1.34      | 96      | 8.1    | 144       | 4             | 70       | 17 |
| C4                                                            | 53      | 106                  | 33                        | 210     | 5               | 4.6      | 2.55    | 1.23      | 126       | 7.2     | 145    | 3.7       | 72            | 19       |    |
| Animal week 4<br>after<br>1 <sup>st</sup> vaccine             | V1      | 50                   | 103                       | 107     | 256             | 5        | 3.8     | 2.48      | 1.42      | 96      | 5.3    | 143       | 4.2           | 66       | 18 |
|                                                               | V2      | 55                   | 117                       | 30      | 254             | 5        | 4.8     | 2.56      | 1.12      | 87      | 6.1    | 142       | 4.3           | 71       | 16 |
|                                                               | V3      | 49                   | 108                       | 90      | 253             | 5        | 4.2     | 2.49      | 1.06      | 75      | 8.2    | 141       | 4.1           | 66       | 17 |
|                                                               | V4      | 50                   | 164                       | 43      | 497             | 5        | 5.4     | 2.52      | 0.91      | 132     | 7      | 145       | 3.6           | 67       | 17 |
|                                                               | V5      | 54                   | 158                       | 27      | 339             | 6        | 4.4     | 2.5       | 1.76      | 104     | 5.6    | 147       | 4             | 74       | 20 |
|                                                               | V6      | 52                   | 237                       | 58      | 460             | 6        | 5.8     | 2.52      | 1.76      | 111     | 6.1    | 150       | 3.6           | 69       | 17 |
|                                                               | C1      | 52                   | 94                        | 35      | 214             | 5        | 4.5     | 2.51      | 1.34      | 96      | 8.1    | 144       | 4             | 70       | 17 |
|                                                               | C2      | 53                   | 106                       | 33      | 210             | 5        | 4.6     | 2.55      | 1.23      | 126     | 7.2    | 145       | 3.7           | 72       | 19 |
|                                                               | C3      | 49                   | 111                       | 25      | 242             | 9        | 3.9     | 2.47      | 1.25      | 92      | 6.1    | 147       | 4             | 66       | 17 |
| C4                                                            | 51      | 389                  | 35                        | 165     | 5               | 5.4      | 2.52    | 1.11      | 115       | 8.2     | 144    | 3.7       | 66            | 15       |    |
| Animal week 6 /<br>week 2<br>after<br>2 <sup>nd</sup> vaccine | V1      | 48                   | 88                        | 69      | 244             | 5        | 4.8     | 2.51      | 1.7       | 86      | 7      | 149       | 4.1           | 64       | 16 |
|                                                               | V2      | 53                   | 103                       | 22      | 252             | 5        | 4.7     | 2.66      | 1.39      | 65      | 6.5    | 154       | 4.4           | 70       | 17 |
|                                                               | V3      | 46                   | 97                        | 71      | 242             | 5        | 5       | 2.58      | 1.36      | 79      | 7.3    | 152       | 3.9           | 66       | 20 |
|                                                               | V4      | 49                   | 128                       | 35      | 299             | 3        | 8       | 2.57      | 1.28      | 126     | 7.2    | 153       | 4             | 67       | 18 |
|                                                               | V5      | 52                   | 144                       | 24      | 318             | 5        | 4.9     | 2.6       | 1.65      | 99      | 7.4    | 155       | 3.8           | 71       | 19 |
|                                                               | V6      | 53                   | 182                       | 64      | 329             | 4        | 6       | 2.59      | 1.71      | 98      | 7.4    | 149       | 3.6           | 75       | 23 |
|                                                               | C1      | 49                   | 104                       | 29      | 270             | 4        | 4.4     | 2.54      | 1.5       | 104     | 9.9    | 150       | 3.8           | 67       | 18 |
|                                                               | C2      | 48                   | 309                       | 30      | 149             | 5        | 6.7     | 2.57      | 1.44      | 115     | 9.4    | 146       | 3.8           | 64       | 16 |
|                                                               | C3      | 49                   | 104                       | 29      | 270             | 4        | 4.4     | 2.54      | 1.5       | 104     | 9.9    | 150       | 3.8           | 67       | 18 |
| C4                                                            | 48      | 309                  | 30                        | 149     | 5               | 6.7      | 2.57    | 1.44      | 115       | 9.4     | 146    | 3.8       | 64            | 16       |    |
